# Supplementary material for: The Plant Ontology Facilitates Comparisons of Plant Development Stages Across Species
Source: PubMed Central journal article supplement (PMC6558174; doi:10.3389/fpls.2019.00631), 2019-06-04
Supplement: Table_2.pdf [file Table_2.pdf]

**GO Information**

**FDR**

| GO Term    | Onto | Description                                                     | Set 1 -             |                             |
|------------|------|-----------------------------------------------------------------|---------------------|-----------------------------|
|            |      |                                                                 | globular not mature | Set 2 - mature not globular |
| GO:0051704 | P    | multi-organism process                                          | 1.1E-09             | ---                         |
| GO:0050896 | P    | response to stimulus                                            | 0.000000013         | 0.01                        |
| GO:0005975 | P    | carbohydrate metabolic process                                  | 0.000000032         | ---                         |
| GO:0006950 | P    | response to stress                                              | 0.00001             | ---                         |
| GO:0009607 | P    | response to biotic stimulus                                     | 0.000029            | ---                         |
| GO:0009856 | P    | pollination                                                     | 0.000046            | ---                         |
| GO:0009056 | P    | catabolic process                                               | 0.00013             | ---                         |
| GO:0003006 | P    | developmental process involved in reproduction                  | 0.00024             | 0.033                       |
| GO:0019748 | P    | secondary metabolic process                                     | 0.00026             | ---                         |
| GO:0009719 | P    | response to endogenous stimulus                                 | 0.00048             | 0.017                       |
| GO:0009605 | P    | response to external stimulus                                   | 0.00055             | ---                         |
| GO:0022414 | P    | reproductive process                                            | 0.00063             | 0.0013                      |
| GO:0006810 | P    | transport                                                       | 0.00063             | ---                         |
| GO:0000003 | P    | reproduction                                                    | 0.00067             | 0.0013                      |
| GO:0048869 | P    | cellular developmental process                                  | 0.00069             | ---                         |
| GO:0051234 | P    | establishment of localization                                   | 0.00069             | ---                         |
| GO:0007154 | P    | cell communication                                              | 0.00094             | 0.000072                    |
| GO:0051179 | P    | localization                                                    | 0.00094             | ---                         |
| GO:0007165 | P    | signal transduction                                             | 0.0011              | 0.000037                    |
| GO:0032502 | P    | developmental process                                           | 0.0014              | 0.0058                      |
| GO:0048856 | P    | anatomical structure development                                | 0.0018              | 0.005                       |
| GO:0030154 | P    | cell differentiation                                            | 0.0022              | 0.034                       |
| GO:0032501 | P    | multicellular organismal process                                | 0.003               | 0.002                       |
| GO:0008152 | P    | metabolic process                                               | 0.0086              | ---                         |
| GO:0065007 | P    | biological regulation                                           | 0.015               | 0.0000066                   |
| GO:0016049 | P    | cell growth                                                     | 0.016               | ---                         |
| GO:0040007 | P    | growth                                                          | 0.018               | ---                         |
| GO:0006629 | P    | lipid metabolic process                                         | 0.042               | ---                         |
| GO:0005215 | F    | transporter activity                                            | 0.00000082          | ---                         |
| GO:0003824 | F    | catalytic activity                                              | 0.000011            | ---                         |
| GO:0003700 | F    | transcription factor activity, sequence-specific DNA binding    | 0.00013             | 0.0000042                   |
| GO:0008289 | F    | lipid binding                                                   | 0.0065              | ---                         |
| GO:0016787 | F    | hydrolase activity                                              | 0.0072              | ---                         |
| GO:0030234 | F    | enzyme regulator activity                                       | 0.045               | ---                         |
| GO:0005576 | C    | extracellular region                                            | 7.9E-21             | ---                         |
| GO:0030312 | C    | external encapsulating structure                                | 3.6E-10             | ---                         |
| GO:0005618 | C    | cell wall                                                       | 3.6E-10             | ---                         |
| GO:0005886 | C    | plasma membrane                                                 | 1.6E-09             | ---                         |
| GO:0016020 | C    | membrane                                                        | 0.036               | ---                         |
| GO:0044421 | C    | extracellular region part                                       | 0.036               | ---                         |
| GO:0031012 | C    | extracellular matrix                                            | 0.036               | ---                         |
| GO:0050794 | P    | regulation of cellular process                                  | ---                 | 0.0000002                   |
| GO:0050789 | P    | regulation of biological process                                | ---                 | 0.00000034                  |
| GO:0060255 | P    | regulation of macromolecule metabolic process                   | ---                 | 0.000001                    |
| GO:0010468 | P    | regulation of gene expression                                   | ---                 | 0.0000038                   |
| GO:0006139 | P    | nucleobase-containing compound metabolic process                | ---                 | 0.0000038                   |
| GO:0019222 | P    | regulation of metabolic process                                 | ---                 | 0.0000043                   |
| GO:0009908 | P    | flower development                                              | ---                 | 0.0001                      |
| GO:0006259 | P    | DNA metabolic process                                           | ---                 | 0.00019                     |
| GO:0007049 | P    | cell cycle                                                      | ---                 | 0.0016                      |
| GO:0007275 | P    | multicellular organism development                              | ---                 | 0.0071                      |
| GO:0009653 | P    | anatomical structure morphogenesis                              | ---                 | 0.0083                      |
| GO:0009791 | P    | post-embryonic development                                      | ---                 | 0.0086                      |
| GO:0044260 | P    | cellular macromolecule metabolic process                        | ---                 | 0.0091                      |
| GO:0048608 | P    | reproductive structure development                              | ---                 | 0.014                       |
| GO:0043170 | P    | macromolecule metabolic process                                 | ---                 | 0.033                       |
| GO:0009987 | P    | cellular process                                                | ---                 | 0.033                       |
| GO:0003677 | F    | DNA binding                                                     | ---                 | 0.00000044                  |
| GO:0005488 | F    | binding                                                         | ---                 | 0.035                       |
| GO:0016301 | F    | kinase activity                                                 | ---                 | 0.035                       |
| GO:0016772 | F    | transferase activity, transferring phosphorus-containing groups | ---                 | 0.035                       |
| GO:0030246 | F    | carbohydrate binding                                            | ---                 | 0.035                       |
| GO:0003676 | F    | nucleic acid binding                                            | ---                 | 0.043                       |
| GO:0019825 | F    | oxygen binding                                                  | ---                 | 0.048                       |
| GO:0005634 | C    | nucleus                                                         | ---                 | 0.0000047                   |
