# Supplementary material for: The Plant Ontology Facilitates Comparisons of Plant Development Stages Across Species
Source: PubMed Central journal article supplement (PMC6558174; doi:10.3389/fpls.2019.00631), 2019-06-04
Supplement: Table_3.pdf [file Table_3.pdf]

**GO Information**

**FDR**

| GO Term    | Onto | Description                                      | Set 3A -<br>coleoptilar not<br>cotyledonary - |     | Set 4 -<br>cotyledonary |
|------------|------|--------------------------------------------------|-----------------------------------------------|-----|-------------------------|
|            |      |                                                  | maize IDs                                     |     |                         |
| GO:0019748 | P    | secondary metabolic process                      | 0.0011                                        | --- |                         |
| GO:0005975 | P    | carbohydrate metabolic process                   | 0.023                                         |     | 0.0000076               |
| GO:0009987 | P    | cellular process                                 | ---                                           |     | 3.1E-77                 |
| GO:0044237 | P    | cellular metabolic process                       | ---                                           |     | 6.2E-50                 |
| GO:0008152 | P    | metabolic process                                | ---                                           |     | 2E-46                   |
| GO:0044238 | P    | primary metabolic process                        | ---                                           |     | 2.9E-37                 |
| GO:0016043 | P    | cellular component organization                  | ---                                           |     | 1.3E-30                 |
| GO:0050896 | P    | response to stimulus                             | ---                                           |     | 5.1E-28                 |
| GO:0009628 | P    | response to abiotic stimulus                     | ---                                           |     | 9.7E-28                 |
| GO:0006139 | P    | nucleobase-containing compound metabolic process | ---                                           |     | 1.2E-27                 |
| GO:0050789 | P    | regulation of biological process                 | ---                                           |     | 8.4E-27                 |
| GO:0032502 | P    | developmental process                            | ---                                           |     | 1E-26                   |
| GO:0048856 | P    | anatomical structure development                 | ---                                           |     | 2.9E-25                 |
| GO:0050794 | P    | regulation of cellular process                   | ---                                           |     | 3.5E-23                 |
| GO:0007275 | P    | multicellular organism development               | ---                                           |     | 4.5E-23                 |
| GO:0032501 | P    | multicellular organismal process                 | ---                                           |     | 5.9E-23                 |
| GO:0009791 | P    | post-embryonic development                       | ---                                           |     | 1.6E-21                 |
| GO:0043412 | P    | macromolecule modification                       | ---                                           |     | 2.9E-19                 |
| GO:0044260 | P    | cellular macromolecule metabolic process         | ---                                           |     | 5E-19                   |
| GO:0043170 | P    | macromolecule metabolic process                  | ---                                           |     | 5.5E-19                 |
| GO:0051179 | P    | localization                                     | ---                                           |     | 2.6E-18                 |
| GO:0051234 | P    | establishment of localization                    | ---                                           |     | 9.9E-18                 |
| GO:0048608 | P    | reproductive structure development               | ---                                           |     | 1.2E-17                 |
| GO:0006810 | P    | transport                                        | ---                                           |     | 1.6E-17                 |
| GO:0065007 | P    | biological regulation                            | ---                                           |     | 4.3E-17                 |
| GO:0006464 | P    | cellular protein modification process            | ---                                           |     | 5.4E-17                 |
| GO:0000003 | P    | reproduction                                     | ---                                           |     | 1.7E-16                 |
| GO:0006807 | P    | nitrogen compound metabolic process              | ---                                           |     | 2E-16                   |
| GO:0022414 | P    | reproductive process                             | ---                                           |     | 2.9E-16                 |
| GO:0003006 | P    | developmental process involved in reproduction   | ---                                           |     | 4.2E-15                 |
| GO:0019222 | P    | regulation of metabolic process                  | ---                                           |     | 5.3E-12                 |
| GO:0006950 | P    | response to stress                               | ---                                           |     | 2.6E-11                 |
| GO:0009719 | P    | response to endogenous stimulus                  | ---                                           |     | 6.6E-11                 |
| GO:0044249 | P    | cellular biosynthetic process                    | ---                                           |     | 6.6E-11                 |
| GO:0009058 | P    | biosynthetic process                             | ---                                           |     | 1.7E-10                 |
| GO:0006259 | P    | DNA metabolic process                            | ---                                           |     | 2.1E-10                 |
| GO:0009790 | P    | embryo development                               | ---                                           |     | 8.3E-10                 |
| GO:0006091 | P    | generation of precursor metabolites and energy   | ---                                           |     | 8.3E-10                 |
| GO:0015979 | P    | photosynthesis                                   | ---                                           |     | 8.5E-10                 |
| GO:0007049 | P    | cell cycle                                       | ---                                           |     | 8.5E-10                 |
| GO:0060255 | P    | regulation of macromolecule metabolic process    | ---                                           |     | 4.3E-09                 |
| GO:0009908 | P    | flower development                               | ---                                           |     | 5.8E-09                 |
| GO:0009653 | P    | anatomical structure morphogenesis               | ---                                           |     | 0.00000007              |
| GO:0009056 | P    | catabolic process                                | ---                                           |     | 0.00000014              |
| GO:0007165 | P    | signal transduction                              | ---                                           |     | 0.00000005              |
| GO:0007154 | P    | cell communication                               | ---                                           |     | 0.00000023              |
| GO:0010468 | P    | regulation of gene expression                    | ---                                           |     | 0.00000072              |
| GO:0006629 | P    | lipid metabolic process                          | ---                                           |     | 0.000001                |
| GO:0019538 | P    | protein metabolic process                        | ---                                           |     | 0.000088                |
| GO:0040007 | P    | growth                                           | ---                                           |     | 0.000098                |
| GO:0044267 | P    | cellular protein metabolic process               | ---                                           |     | 0.00027                 |
| GO:0048869 | P    | cellular developmental process                   | ---                                           |     | 0.00031                 |
| GO:0042592 | P    | homeostatic process                              | ---                                           |     | 0.00032                 |
| GO:0019725 | P    | cellular homeostasis                             | ---                                           |     | 0.0013                  |
| GO:0030154 | P    | cell differentiation                             | ---                                           |     | 0.019                   |
| GO:0008219 | P    | cell death                                       | ---                                           |     | 0.02                    |
| GO:0016049 | P    | cell growth                                      | ---                                           |     | 0.021                   |
| GO:0010467 | P    | gene expression                                  | ---                                           |     | 0.035                   |
| GO:0005515 | F    | protein binding                                  | ---                                           |     | 4.3E-57                 |
| GO:0005488 | F    | binding                                          | ---                                           |     | 7E-56                   |
| GO:0003824 | F    | catalytic activity                               | ---                                           |     | 2E-55                   |

|            |   |                                                                  |     |            |
|------------|---|------------------------------------------------------------------|-----|------------|
| GO:0000166 | F | nucleotide binding                                               | --- | 3.8E-29    |
| GO:0016787 | F | hydrolase activity                                               | --- | 1.3E-17    |
| GO:0016740 | F | transferase activity                                             | --- | 3.5E-17    |
| GO:0016817 | F | hydrolase activity, acting on acid anhydrides                    | --- | 1.8E-11    |
| GO:0016818 | F | hydrolase activity, acting on acid anhydrides, in phosphorus-con | --- | 1.9E-11    |
| GO:0016462 | F | pyrophosphatase activity                                         | --- | 2.4E-11    |
| GO:0017111 | F | nucleoside-triphosphatase activity                               | --- | 3.3E-10    |
| GO:0016772 | F | transferase activity, transferring phosphorus-containing groups  | --- | 0.00000072 |
| GO:0005215 | F | transporter activity                                             | --- | 0.0000004  |
| GO:0005198 | F | structural molecule activity                                     | --- | 0.00000053 |
| GO:0003677 | F | DNA binding                                                      | --- | 0.000001   |
| GO:0016788 | F | hydrolase activity, acting on ester bonds                        | --- | 0.0000018  |
| GO:0016301 | F | kinase activity                                                  | --- | 0.0000032  |
| GO:0004518 | F | nuclease activity                                                | --- | 0.00034    |
| GO:0003676 | F | nucleic acid binding                                             | --- | 0.0021     |
| GO:0003774 | F | motor activity                                                   | --- | 0.013      |
| GO:0008135 | F | translation factor activity, RNA binding                         | --- | 0.017      |
| GO:0060089 | F | molecular transducer activity                                    | --- | 0.019      |
| GO:0004872 | F | receptor activity                                                | --- | 0.019      |
| GO:0003682 | F | chromatin binding                                                | --- | 0.021      |
| GO:0004871 | F | signal transducer activity                                       | --- | 0.036      |
| GO:0005623 | C | cell                                                             | --- | 4.3E-187   |
| GO:0044464 | C | cell part                                                        | --- | 5.1E-187   |
| GO:0005622 | C | intracellular                                                    | --- | 1.7E-144   |
| GO:0044424 | C | intracellular part                                               | --- | 1.8E-143   |
| GO:0044422 | C | organelle part                                                   | --- | 1.4E-128   |
| GO:0044446 | C | intracellular organelle part                                     | --- | 1.8E-128   |
| GO:0005737 | C | cytoplasm                                                        | --- | 5.5E-111   |
| GO:0043226 | C | organelle                                                        | --- | 6.7E-111   |
| GO:0043229 | C | intracellular organelle                                          | --- | 7.4E-111   |
| GO:0043227 | C | membrane-bounded organelle                                       | --- | 8.9E-101   |
| GO:0043231 | C | intracellular membrane-bounded organelle                         | --- | 1.4E-100   |
| GO:0044444 | C | cytoplasmic part                                                 | --- | 4.8E-96    |
| GO:0009536 | C | plastid                                                          | --- | 3.1E-59    |
| GO:0032991 | C | macromolecular complex                                           | --- | 3E-48      |
| GO:0005829 | C | cytosol                                                          | --- | 4.8E-47    |
| GO:0016020 | C | membrane                                                         | --- | 4.6E-44    |
| GO:0031975 | C | envelope                                                         | --- | 2.8E-32    |
| GO:0031967 | C | organelle envelope                                               | --- | 2.8E-32    |
| GO:0012505 | C | endomembrane system                                              | --- | 3.4E-28    |
| GO:0043232 | C | intracellular non-membrane-bounded organelle                     | --- | 7.6E-28    |
| GO:0043228 | C | non-membrane-bounded organelle                                   | --- | 7.6E-28    |
| GO:0005773 | C | vacuole                                                          | --- | 6.1E-27    |
| GO:0031974 | C | membrane-enclosed lumen                                          | --- | 5.2E-25    |
| GO:0043233 | C | organelle lumen                                                  | --- | 5.2E-25    |
| GO:0070013 | C | intracellular organelle lumen                                    | --- | 5.2E-25    |
| GO:0044428 | C | nuclear part                                                     | --- | 6.7E-25    |
| GO:0005886 | C | plasma membrane                                                  | --- | 2E-22      |
| GO:0009579 | C | thylakoid                                                        | --- | 2.5E-22    |
| GO:0031981 | C | nuclear lumen                                                    | --- | 1.1E-20    |
| GO:0005634 | C | nucleus                                                          | --- | 5.8E-19    |
| GO:0005794 | C | Golgi apparatus                                                  | --- | 1.7E-17    |
| GO:0005783 | C | endoplasmic reticulum                                            | --- | 2.3E-13    |
| GO:0005768 | C | endosome                                                         | --- | 2.7E-11    |
| GO:0005730 | C | nucleolus                                                        | --- | 1.2E-10    |
| GO:0030529 | C | intracellular ribonucleoprotein complex                          | --- | 2.6E-10    |
| GO:0005654 | C | nucleoplasm                                                      | --- | 3.3E-09    |
| GO:0005840 | C | ribosome                                                         | --- | 0.00000049 |
| GO:0005856 | C | cytoskeleton                                                     | --- | 0.00000025 |
| GO:0005777 | C | peroxisome                                                       | --- | 0.00015    |
| GO:0042579 | C | microbody                                                        | --- | 0.00015    |
| GO:0005635 | C | nuclear envelope                                                 | --- | 0.00047    |
| GO:0030312 | C | external encapsulating structure                                 | --- | 0.007      |
| GO:0005618 | C | cell wall                                                        | --- | 0.007      |
