# Supplementary material for: The Plant Ontology Facilitates Comparisons of Plant Development Stages Across Species
Source: PubMed Central journal article supplement (PMC6558174; doi:10.3389/fpls.2019.00631), 2019-06-04
Supplement: Table_4.pdf [file Table_4.pdf]

| GO Information |      |                                                  | FDR                                                        |                         |
|----------------|------|--------------------------------------------------|------------------------------------------------------------|-------------------------|
| GO Term        | Onto | Description                                      | Set 3B -                                                   |                         |
|                |      |                                                  | Set 3B -<br>coleoptilar not<br>cotyledonary -<br>arab. IDs | Set 4 -<br>cotyledonary |
| GO:0005975     | P    | carbohydrate metabolic process                   | 0.0016                                                     | 0.0000076               |
| GO:0009719     | P    | response to endogenous stimulus                  | 0.002                                                      | 6.6E-11                 |
| GO:0009056     | P    | catabolic process                                | 0.002                                                      | 0.000000014             |
| GO:0006810     | P    | transport                                        | 0.01                                                       | 1.6E-17                 |
| GO:0051234     | P    | establishment of localization                    | 0.01                                                       | 9.9E-18                 |
| GO:0051179     | P    | localization                                     | 0.011                                                      | 2.6E-18                 |
| GO:0009856     | P    | pollination                                      | 0.05                                                       | ---                     |
| GO:0003824     | F    | catalytic activity                               | 0.000055                                                   | 2E-55                   |
| GO:0005215     | F    | transporter activity                             | 0.0011                                                     | 0.0000004               |
| GO:0016788     | F    | hydrolase activity, acting on ester bonds        | 0.012                                                      | 0.0000018               |
| GO:0005886     | C    | plasma membrane                                  | 0.013                                                      | 2E-22                   |
| GO:0005576     | C    | extracellular region                             | 0.013                                                      | ---                     |
| GO:0030312     | C    | external encapsulating structure                 | 0.032                                                      | 0.007                   |
| GO:0005618     | C    | cell wall                                        | 0.032                                                      | 0.007                   |
| GO:0016020     | C    | membrane                                         | 0.037                                                      | 4.6E-44                 |
| GO:0009987     | P    | cellular process                                 | ---                                                        | 3.1E-77                 |
| GO:0044237     | P    | cellular metabolic process                       | ---                                                        | 6.2E-50                 |
| GO:0008152     | P    | metabolic process                                | ---                                                        | 2E-46                   |
| GO:0044238     | P    | primary metabolic process                        | ---                                                        | 2.9E-37                 |
| GO:0016043     | P    | cellular component organization                  | ---                                                        | 1.3E-30                 |
| GO:0050896     | P    | response to stimulus                             | ---                                                        | 5.1E-28                 |
| GO:0009628     | P    | response to abiotic stimulus                     | ---                                                        | 9.7E-28                 |
| GO:0006139     | P    | nucleobase-containing compound metabolic process | ---                                                        | 1.2E-27                 |
| GO:0050789     | P    | regulation of biological process                 | ---                                                        | 8.4E-27                 |
| GO:0032502     | P    | developmental process                            | ---                                                        | 1E-26                   |
| GO:0048856     | P    | anatomical structure development                 | ---                                                        | 2.9E-25                 |
| GO:0050794     | P    | regulation of cellular process                   | ---                                                        | 3.5E-23                 |
| GO:0007275     | P    | multicellular organism development               | ---                                                        | 4.5E-23                 |
| GO:0032501     | P    | multicellular organismal process                 | ---                                                        | 5.9E-23                 |
| GO:0009791     | P    | post-embryonic development                       | ---                                                        | 1.6E-21                 |
| GO:0043412     | P    | macromolecule modification                       | ---                                                        | 2.9E-19                 |
| GO:0044260     | P    | cellular macromolecule metabolic process         | ---                                                        | 5E-19                   |
| GO:0043170     | P    | macromolecule metabolic process                  | ---                                                        | 5.5E-19                 |
| GO:0048608     | P    | reproductive structure development               | ---                                                        | 1.2E-17                 |
| GO:0065007     | P    | biological regulation                            | ---                                                        | 4.3E-17                 |
| GO:0006464     | P    | cellular protein modification process            | ---                                                        | 5.4E-17                 |
| GO:0000003     | P    | reproduction                                     | ---                                                        | 1.7E-16                 |
| GO:0006807     | P    | nitrogen compound metabolic process              | ---                                                        | 2E-16                   |
| GO:0022414     | P    | reproductive process                             | ---                                                        | 2.9E-16                 |
| GO:0003006     | P    | developmental process involved in reproduction   | ---                                                        | 4.2E-15                 |
| GO:0019222     | P    | regulation of metabolic process                  | ---                                                        | 5.3E-12                 |
| GO:0006950     | P    | response to stress                               | ---                                                        | 2.6E-11                 |
| GO:0044249     | P    | cellular biosynthetic process                    | ---                                                        | 6.6E-11                 |
| GO:0009058     | P    | biosynthetic process                             | ---                                                        | 1.7E-10                 |
| GO:0006259     | P    | DNA metabolic process                            | ---                                                        | 2.1E-10                 |
| GO:0009790     | P    | embryo development                               | ---                                                        | 8.3E-10                 |
| GO:0006091     | P    | generation of precursor metabolites and energy   | ---                                                        | 8.3E-10                 |
| GO:0015979     | P    | photosynthesis                                   | ---                                                        | 8.5E-10                 |
| GO:0007049     | P    | cell cycle                                       | ---                                                        | 8.5E-10                 |
| GO:0060255     | P    | regulation of macromolecule metabolic process    | ---                                                        | 4.3E-09                 |
| GO:0009908     | P    | flower development                               | ---                                                        | 5.8E-09                 |
| GO:0009653     | P    | anatomical structure morphogenesis               | ---                                                        | 0.000000007             |
| GO:0007165     | P    | signal transduction                              | ---                                                        | 0.00000005              |
| GO:0007154     | P    | cell communication                               | ---                                                        | 0.00000023              |
| GO:0010468     | P    | regulation of gene expression                    | ---                                                        | 0.00000072              |
| GO:0006629     | P    | lipid metabolic process                          | ---                                                        | 0.000001                |
| GO:0019538     | P    | protein metabolic process                        | ---                                                        | 0.000088                |
| GO:0040007     | P    | growth                                           | ---                                                        | 0.000098                |
| GO:0044267     | P    | cellular protein metabolic process               | ---                                                        | 0.00027                 |
| GO:0048869     | P    | cellular developmental process                   | ---                                                        | 0.00031                 |
| GO:0042592     | P    | homeostatic process                              | ---                                                        | 0.00032                 |

|            |   |                                                                 |     |             |
|------------|---|-----------------------------------------------------------------|-----|-------------|
| GO:0019725 | P | cellular homeostasis                                            | --- | 0.0013      |
| GO:0030154 | P | cell differentiation                                            | --- | 0.019       |
| GO:0008219 | P | cell death                                                      | --- | 0.02        |
| GO:0016049 | P | cell growth                                                     | --- | 0.021       |
| GO:0010467 | P | gene expression                                                 | --- | 0.035       |
| GO:0005515 | F | protein binding                                                 | --- | 4.3E-57     |
| GO:0005488 | F | binding                                                         | --- | 7E-56       |
| GO:0000166 | F | nucleotide binding                                              | --- | 3.8E-29     |
| GO:0016787 | F | hydrolase activity                                              | --- | 1.3E-17     |
| GO:0016740 | F | transferase activity                                            | --- | 3.5E-17     |
| GO:0016817 | F | hydrolase activity, acting on acid anhydrides                   | --- | 1.8E-11     |
|            |   | hydrolase activity, acting on acid anhydrides, in phosphorus-   |     |             |
| GO:0016818 | F | containing anhydrides                                           | --- | 1.9E-11     |
| GO:0016462 | F | pyrophosphatase activity                                        | --- | 2.4E-11     |
| GO:0017111 | F | nucleoside-triphosphatase activity                              | --- | 3.3E-10     |
| GO:0016772 | F | transferase activity, transferring phosphorus-containing groups | --- | 0.000000072 |
| GO:0005198 | F | structural molecule activity                                    | --- | 0.00000053  |
| GO:0003677 | F | DNA binding                                                     | --- | 0.000001    |
| GO:0016301 | F | kinase activity                                                 | --- | 0.0000032   |
| GO:0004518 | F | nuclease activity                                               | --- | 0.00034     |
| GO:0003676 | F | nucleic acid binding                                            | --- | 0.0021      |
| GO:0003774 | F | motor activity                                                  | --- | 0.013       |
| GO:0008135 | F | translation factor activity, RNA binding                        | --- | 0.017       |
| GO:0060089 | F | molecular transducer activity                                   | --- | 0.019       |
| GO:0004872 | F | receptor activity                                               | --- | 0.019       |
| GO:0003682 | F | chromatin binding                                               | --- | 0.021       |
| GO:0004871 | F | signal transducer activity                                      | --- | 0.036       |
| GO:0005623 | C | cell                                                            | --- | 4.3E-187    |
| GO:0044464 | C | cell part                                                       | --- | 5.1E-187    |
| GO:0005622 | C | intracellular                                                   | --- | 1.7E-144    |
| GO:0044424 | C | intracellular part                                              | --- | 1.8E-143    |
| GO:0044422 | C | organelle part                                                  | --- | 1.4E-128    |
| GO:0044446 | C | intracellular organelle part                                    | --- | 1.8E-128    |
| GO:0005737 | C | cytoplasm                                                       | --- | 5.5E-111    |
| GO:0043226 | C | organelle                                                       | --- | 6.7E-111    |
| GO:0043229 | C | intracellular organelle                                         | --- | 7.4E-111    |
| GO:0043227 | C | membrane-bounded organelle                                      | --- | 8.9E-101    |
| GO:0043231 | C | intracellular membrane-bounded organelle                        | --- | 1.4E-100    |
| GO:0044444 | C | cytoplasmic part                                                | --- | 4.8E-96     |
| GO:0009536 | C | plastid                                                         | --- | 3.1E-59     |
| GO:0032991 | C | macromolecular complex                                          | --- | 3E-48       |
| GO:0005829 | C | cytosol                                                         | --- | 4.8E-47     |
| GO:0031975 | C | envelope                                                        | --- | 2.8E-32     |
| GO:0031967 | C | organelle envelope                                              | --- | 2.8E-32     |
| GO:0012505 | C | endomembrane system                                             | --- | 3.4E-28     |
| GO:0043232 | C | intracellular non-membrane-bounded organelle                    | --- | 7.6E-28     |
| GO:0043228 | C | non-membrane-bounded organelle                                  | --- | 7.6E-28     |
| GO:0005773 | C | vacuole                                                         | --- | 6.1E-27     |
| GO:0031974 | C | membrane-enclosed lumen                                         | --- | 5.2E-25     |
| GO:0043233 | C | organelle lumen                                                 | --- | 5.2E-25     |
| GO:0070013 | C | intracellular organelle lumen                                   | --- | 5.2E-25     |
| GO:0044428 | C | nuclear part                                                    | --- | 6.7E-25     |
| GO:0009579 | C | thylakoid                                                       | --- | 2.5E-22     |
| GO:0031981 | C | nuclear lumen                                                   | --- | 1.1E-20     |
| GO:0005634 | C | nucleus                                                         | --- | 5.8E-19     |
| GO:0005794 | C | Golgi apparatus                                                 | --- | 1.7E-17     |
| GO:0005783 | C | endoplasmic reticulum                                           | --- | 2.3E-13     |
| GO:0005768 | C | endosome                                                        | --- | 2.7E-11     |
| GO:0005730 | C | nucleolus                                                       | --- | 1.2E-10     |
| GO:0030529 | C | intracellular ribonucleoprotein complex                         | --- | 2.6E-10     |
| GO:0005654 | C | nucleoplasm                                                     | --- | 3.3E-09     |
| GO:0005840 | C | ribosome                                                        | --- | 0.000000049 |
| GO:0005856 | C | cytoskeleton                                                    | --- | 0.00000025  |
| GO:0005777 | C | peroxisome                                                      | --- | 0.00015     |
| GO:0042579 | C | microbody                                                       | --- | 0.00015     |
| GO:0005635 | C | nuclear envelope                                                | --- | 0.00047     |
